# Supplementary material
Source: MDPI journal article supplement (https://www.mdpi.com/2071-1050/10/12/4518)
Supplement: s1 [file s1]

## **Appendix A: GRI - G3.1 Guidelines For Environmental and Social Performance Indicators**

### **Environmental Performance Indicators**

#### **Aspect: Materials**

EN1 Materials used by weight or volume

EN2 Percentage of materials used that are recycled input materials

#### **Aspect: Energy**

EN3 Direct energy consumption by primary energy source

EN4 Indirect energy consumption by primary source

EN5 Energy saved due to conservation and efficiency improvements

EN6 Initiatives to provide energy-efficient or renewable energy based products and services, and reductions in energy requirements as a result of these initiatives.

EN7 Initiatives to reduce indirect energy consumption and reductions achieved

#### **Aspect: Water**

EN8 Total water withdrawal by source

EN9 Water sources significantly affected by withdrawal of water

EN10 Percentage and total volume of water recycled and reused

#### **Aspect: Biodiversity**

EN11 Location and size of land owned, leased, managed in, or adjacent to, protected areas and areas of high biodiversity value outside protected areas

EN12 Description of significant impacts of activities, products, and services on biodiversity in protected areas and areas of high biodiversity value outside protected areas

EN13 Habitats protected or restored

EN14 Strategies, current actions, and future plans for managing impacts on biodiversity

EN15 Number of IUCN Red List species and national conservation list species with habitats in areas affected by operations, by level of extinction risk

#### **Aspect: Emissions, Effluents, and Waste**

EN16 Total direct and indirect greenhouse gas emissions by weight

EN17 other relevant indirect greenhouse gas emissions by weight

EN18 Initiatives to reduce greenhouse gas emissions and reductions achieved

EN19 Emissions of ozone-depleting substances by weight

EN20 NO<sub>x</sub>, SO<sub>x</sub>, and other significant air emissions by type and weight

EN21 Total water discharge by quality and destination

EN22 Total weight of waste by type and disposal method

EN23 Total number and volume of significant spills

EN24 Weight of transported, imported, exported, or treated waste deemed hazardous under the terms of the Basel Convention Annex I, II, III, and VIII, and percentage of transported waste shipped internationally.

EN25 Identity, size, protected status, and biodiversity value of water bodies and related habitats significantly affected by the reporting organization's discharges of water and runoff

#### **Aspect: Products and Services**

EN26 Initiatives to mitigate environmental impacts of products and services, and extent of impact mitigation.

EN27 Percentage of products sold and their packaging materials that are reclaimed by category

#### **Aspect: Compliance**

EN28 Monetary value of significant fines and total number of non-monetary sanctions for noncompliance with environmental laws and regulations

#### **Aspect: Transport**

EN29 Significant environmental impacts of transporting products and other goods and materials used for the organization's operations, and transporting members of the workforce

#### **Aspect: Overall**

EN30 Total environmental protection expenditures and investments by type

### **Social Performance Indicators**

#### **Labor Practices and Decent Work Performance Indicators**

##### **Aspect: Employment**

LA1 Total workforce by employment type, employment contract, and region, broken down by gender

LA2 Total number and rate of new employee hires and employee turnover by age group, gender, and region

LA3 Benefits provided to full-time employees that are not provided to temporary or part-time employees, by significant locations of operation

LA15 Return to work and retention rates after parental leave, by gender

##### **Aspect: Labor/Management Relations**

LA4 Percentage of employees covered by collective bargaining agreements

LA5 Minimum notice period (s) regarding operational changes, including whether it is specified in collective agreements

##### **Aspect: Occupational Health and Safety**

LA6 Percentage of total workforce represented informal joint management-worker health and safety committees that help monitor and advice on occupational health and safety programs

LA7 Rates of injury, occupational diseases, lost days, and absenteeism, and total number of work-related fatalities, by region and by gender

LA8 Education, training, counseling, prevention, and risk-control programs in place to assist workforce members, their families, or community members regarding serious diseases

LA9 Health and safety topics covered in formal agreements with trade unions

##### **Aspect: Training and Education**

LA10 Average hours of training per year per employee by gender, and by employee category

LA11 Programs for skills management and lifelong learning that support the continued employability of employees and assist them in managing career endings

LA12 Percentage of employees receiving regular performance and career development reviews, by gender

##### **Aspect: Diversity and Equal Opportunity**

LA13 Composition of governance bodies and breakdown of employees per employee category according to gender, age group, minority group membership, and other indicators of diversity

##### **Aspect: Equal Remuneration for Women and Men**

LA14 Ratio of basic salary and remuneration of women to men by employee category, by significant locations of operation

## **Appendix A: GRI - G3.1 Guidelines For Environmental and Social Performance Indicators**

### **Human Rights Performance Indicators**

#### **Aspect: Investment and Procurement Practices**

HR1 Percentage and total number of significant investment agreements and contracts that include clauses incorporating human rights concerns, or that have undergone human rights screening

HR2 Percentage of significant suppliers, contractors, and other business partners that have undergone human rights screening, and actions taken

HR3 Total hours of employee training on policies and procedures concerning aspects of human rights that are relevant to operations, including the percentage of employees trained

#### **Aspect: Non-discrimination**

HR4 Total number of incidents of discrimination and corrective actions taken

#### **Aspect: Freedom of Association and Collective Bargaining**

HR5 Operations and significant suppliers identified in which the right to exercise freedom of association and collective bargaining may be violated or at significant risk, and actions taken to support these rights

#### **Aspect: Child Labor**

HR6 Operations and significant suppliers identified as having significant risk for incidents of child labor, and measures taken to contribute to the effective abolition of child labor

#### **Aspect: Forced and Compulsory Labor**

HR7 Operations and significant suppliers identified as having significant risk for incidents of forced or compulsory labor, and measures to contribute to the elimination of all forms of forced or compulsory labor

#### **Aspect: Security Practices**

HR8 Percentage of security personnel trained in the organization's policies or procedures concerning aspects of human rights that are relevant to operations

#### **Aspect: Indigenous Rights**

HR9 Total number of incidents of violations involving rights of indigenous people and actions taken

#### **Aspect: Assessment**

HR10 Percentage and total number of operations that have been subject to human rights reviews and/or impact assessments

#### **Aspect: Remediation**

HR11 Number of grievances related to human rights filed, addressed and resolved through formal grievance mechanisms

### **Society Performance Indicators**

#### **Aspect: Local Communities**

SO1 Percentage of operations with implemented local community engagement, impact assessments, and development programs

SO9 Operations with significant potential or actual negative impacts on local communities

SO10 Prevention and mitigation measures implemented in operations with significant potential or actual negative impacts on local communities

#### **Aspect: Corruption**

SO2 Percentage and total number of business units analyzed for risks related to corruption

SO3 Percentage of employees trained in organization's anti-corruption policies and procedures

SO4 Actions taken in response to incidents of corruption

#### **Aspect: Public Policy**

SO5 Public policy positions and participation in public policy development and lobbying

SO6 Total value of financial and in-kind contributions to political parties, politicians, and related institutions by country

#### **Aspect: Anti-Competitive Behavior**

SO7 Total number of legal actions for anticompetitive behavior, anti-trust, and monopoly practices and their outcomes

#### **Aspect: Compliance**

SO8 Monetary value of significant fines and total number of non-monetary sanctions for noncompliance with laws and regulations

### **Product Responsibility Performance Indicators**

#### **Aspect: Customer Health and Safety**

PR1 Life cycle stages in which health and safety impacts of products and services are assessed for improvement, and percentage of significant products and services categories subject to such procedures

PR2 Total number of incidents of non-compliance with regulations and

voluntary codes concerning health and safety impacts of products and services during their life cycle, by type of outcomes

#### **Aspect: Product and Service Labeling**

PR3 Type of product and service information required by procedures and percentage of significant products and services subject to such information requirements

PR4 Total number of incidents of non-compliance with regulations and voluntary codes concerning product and service information and labeling, by type of outcomes

PR5 Practices related to customer satisfaction, including results of surveys measuring customer satisfaction

#### **Aspect: Marketing Communications**

PR6 Programs for adherence to laws, standards, and voluntary codes related to marketing communications, including advertising, promotion, and sponsorship

PR7 Total number of incidents of non-compliance with regulations and voluntary codes concerning marketing communications, including advertising, promotion, and sponsorship by type of outcomes

#### **Aspect: Customer Privacy**

PR8 Total number of substantiated complaints regarding breaches of customer privacy and losses of customer data

#### **Aspect: Compliance**

PR9 Monetary value of significant fines for noncompliance with laws and regulations concerning the provision and use of products and services
